# Supplementary material
Source: PubMed Central journal article supplement (PMC3709433)
Supplement: NIHMS323993-supplement-1.pdf [file NIHMS323993-supplement-1.pdf]

## **SUPPLEMENTAL FIGURE LEGENDS**

**Supplemental Figure 1. CD4 T cell numbers from the brains and spinal cords of mice during EAE.** (a,b) EAE was induced in WT and IFN $\gamma$ -deficient mice by MOG immunization and the numbers of (a) CD4 T cells and (b) Tbet-positive CD4 T cells were enumerated from BR and SC on d20; data is cumulative of two independent experiments. (c,d) WT and STAT1-deficient mice (B6 genetic background) were immunized with MOG peptide and the numbers of (c) CD4 T cells and (d) Tbet-positive CD4 T cells were enumerated from BR and SC on d20. Data shown is from one experiment.

**Supplemental Figure 2. IL-12 levels minimally impact the frequency of IL-17A-producing CD4 T cells.** EAE was induced in WT and IL-12p35-deficient mice (a) without or (b) with anti-IFN $\gamma$  treatment and the production of IL-17A in CD4 T cells was analyzed after restimulation with PMA/ionomycin by flow cytometry. Data are cumulative of two independent experiments; \* p <0.05.

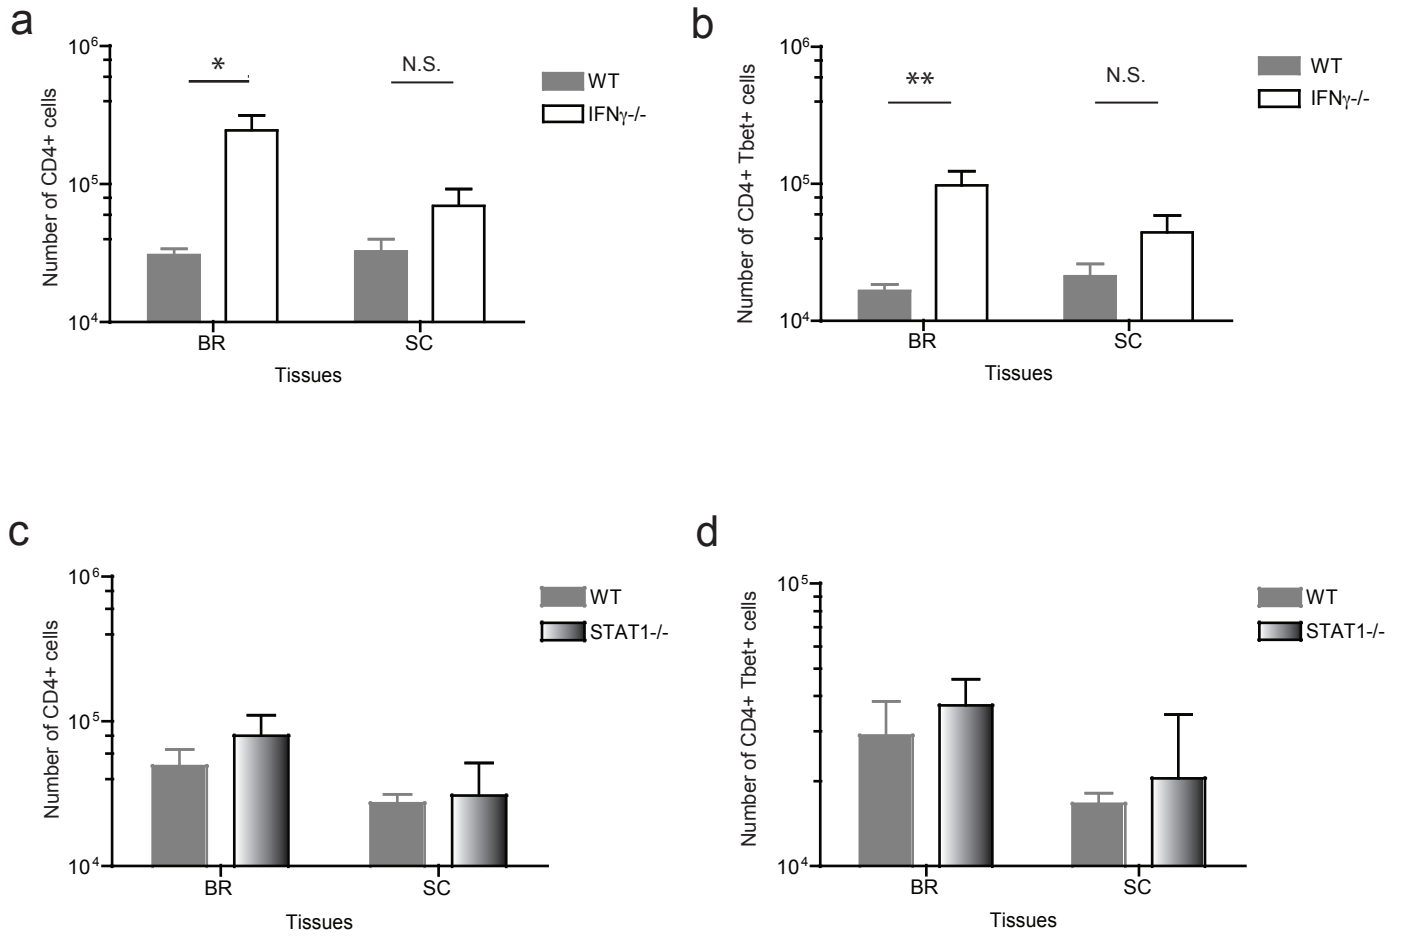

Supplemental Figure 1

a

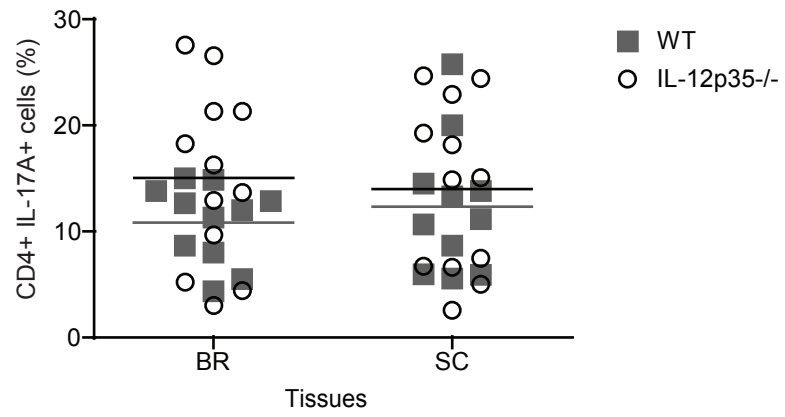

b

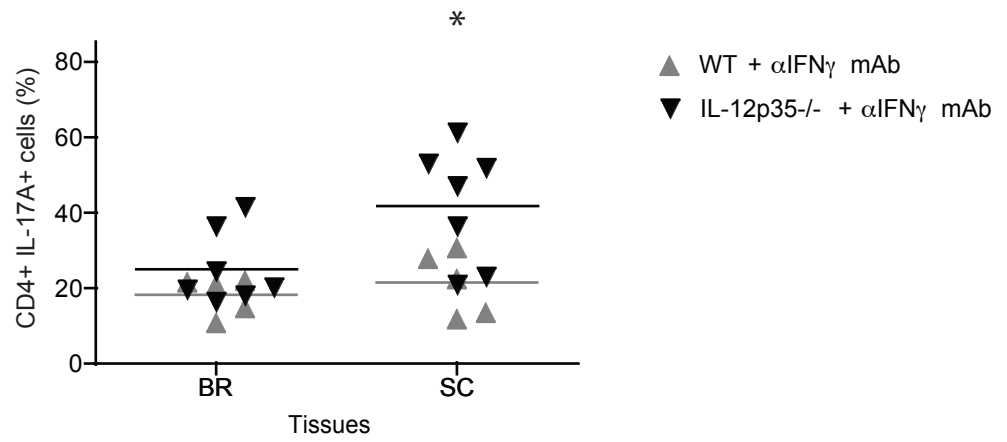

Supplemental Figure 2

Table S1. Real-time PCR primer sets

| Name                     | Sequence                        |
|--------------------------|---------------------------------|
| Tbet forward             | 5'-ACCAGAGCGGCAAGTGGG-3'        |
| Tbet reverse             | 5'-TGGACATATAAGCGGTTCCCTG-3'    |
| STAT4 forward            | 5'-CTGGGAGTAAAGGAAACGAGG-3'     |
| STAT4 reverse            | 5'-GCTGGTCTCTAGGTTAATGGTG-3'    |
| IL-12R $\beta$ 2 forward | 5'-CCTCTTAACAGCACGTCCTGG-3'     |
| IL-12R $\beta$ 2 reverse | 5'-GGTCTCAGATCTCGCAGGTCA-3'     |
| CXCR3 forward            | 5'-GAGTATGACGATTCTGCTGAGG-3'    |
| CXCR3 reverse            | 5'-CAGACCGAACGTGAAGACGAG-3'     |
| IL-18R forward           | 5'-TGCTTGTTCTCGCCTCTGTG-3'      |
| IL-18R reverse           | 5'-ACCATCTGTTAGTGTCTCGTCTC-3'   |
| IL-21 forward            | 5'-AAGATTCCTGAGGATCCGAGAAG-3'   |
| IL-21 reverse            | 5'-GCATTCGTGAGCGTCTATAGTGTG-3'  |
| IL-23R forward           | 5'-GCCAAGAGAACCATTCCCGA-3'      |
| IL-23R reverse           | 5'-TCAGTGCTACAATCTTCAGAGGACA-3' |
| ROR $\gamma$ t forward   | 5'-CCGCTGAGAGGGCTTCAC-3'        |
| ROR $\gamma$ t reverse   | 5'-TGCAGGAGTAGGCCACATTACA-3'    |
| IL-17A forward           | 5'-CTCCAGAAGGCCCTCAGACTAC-3'    |
| IL-17A reverse           | 5'-GGGTCTTCATTGCGGTGG-3'        |
| AHR forward              | 5'-CGCCTCCGGGACGCAGGTGG-3'      |
| AHR reverse              | 5'-AAAGAAGCTCTTGGCCCTCAG-3'     |
| Gata-3 forward           | 5'-CAGAACCGGCCCTTATC-3'         |
| Gata-3 reverse           | 5'-CATTAGCGTTCCTCCTCCAGA-3'     |
| Foxp3 forward            | 5'-TTCATGCATCAGCTCTCCAC-3'      |
| Foxp3 reverse            | 5'-CTGGACACCCATTCCAGACT-3'      |
| IL-10 forward            | 5'-ATGAGTTTTTCCCTTATGGGGAC-3'   |
| IL-10 reverse            | 5'-GCTGGAAGTTGGACACCTCAA-3'     |
| $\beta$ 2M forward       | 5'-CCTGCAGAGTTAAGCATGCCAG-3'    |
| $\beta$ 2M reverse       | 5'-TGCTTGATCACATGTCTCGATCC-3'   |

Table S2. Encephalitogenicity in EAE induced mice deficient in various Th1-associated factors and WT mice as control.

|                                                                  | <b>Incidence</b> | <b>Day on onset</b> | <b>Maximum score</b> |
|------------------------------------------------------------------|------------------|---------------------|----------------------|
| <b>WT<sup>a</sup></b>                                            | 66% (6/9)        | 16± 2.9             | 1.75± 1.26           |
| <b>STAT1-/-<sup>a</sup></b>                                      | 89% (8/9)        | 12± 1.3             | 2.65± 1.50           |
| <b>WT<sup>b</sup></b>                                            | 100% (13/13)     | 12.2± 2.8           | 2.71± 0.77           |
| <b>IL-12p35-/-<sup>b</sup></b>                                   | 100% (15/15)     | 13.9± 2.5           | 2.5± 1.20            |
| <b>WT<sup>b</sup> +αIFN<math>\gamma</math> mAb</b>               | 100% (5/5)       | 11.4± 1.1           | 1.65± 0.99           |
| <b>IL-12p35-/-<sup>b</sup> +<br/>αIFN<math>\gamma</math> mAb</b> | 100% (7/7)       | 10.3± 1.8           | 3.25± 1.14           |

<sup>a</sup>Mice are in 129S6 background.

<sup>b</sup>Mice are in C57BL/6J background.

Supplemental Table 2
